# Supplementary material for: GLORI for absolute quantification of transcriptome-wide m6A at single-base resolution
Source: Springer Nature journal article supplement (doi:10.1038/s41596-023-00937-1), 2024-01-22
Supplement: MOESM3 [file 41596_2023_937_MOESM3_ESM10.xlsx]

## Sheet: Supplementary Table 1
	Shen W. et al.
	Supplementary Table 1 | Sequence of 3′ DNA/RNA adaptor and RT primer for library preparation
	Probe Name	Sequence (5'-->3')	Steps	Application
	3′ RNA adaptor	rAppAGATCGGAAGAGCGTCGTG	43	3′ adaptor ligation of RNA
	RT primer	ACACGACGCTCTTCCGATCT	53	Reverse transcription of adaptor ligated RNA
	3′ DNA adaptor	Phos-NNNNNNNNNNAGATCGGAAGAGCACACGTCTG	76	3′ adaptor ligation of cDNA

## Sheet: Supplementary Table 2 
	Shen W. et al.
	Supplementary Table 2 | Sequence of spike-in probes.
	Probe Name	Spike-in probe sequence (5'-->3')	Steps	Application
	Probe 1	AGCGCAGCGAACAUGACACGUGCUCAACAGUGUAGUUGGACUUCCUCGCAUCUAGCCGCUAUGCACGUGCAGCU	13	Positive control for GLORI (optional)
	Probe 2	AUCUACCUGUCCAGUAGCCUUCAGGAUCAUGCUGUCUGACUUGCUGGACAUCAUUCUAGUGCCAUAACUUCAGC	13	Positive control for GLORI (optional)
	Probe 3	UAUGGUUUAGAUUGAAUGUUGUUGUUGUGAGGACCUUAUGUAAGUUGAAUGGUAAUAGGAAGAAGUUUG	13	Positive control for GLORI (optional)
	Probe 4	UUGUUUGAUGGAGGGGGAUAAUUAUUGGAACAGGUAGUUAAUAUUGUAUAAUGUUGUAAGAUUAAAGAGGG	13	Positive control for GLORI (optional)
	Probe 5	AGCGCAGCGAACAUGACACGUGCUCAACAGUGUAGUUGG(m6A)CUUCCUCGCAUCUAGCCGCUAUGCACGUGCAGCU	Steps 13, 15 and 37 of the main procedure; Box 2	Positive control for GLORI (Step 13, optional) and the probe for evaluation of deamination (Steps 15,37 and Box 2, optional)
	Probe 6	AUCUACCUGUCCAGUAGCCUUCAGGAUCAUGCUGUCUGACUUGCUGG(m6A)CAUCAUUCUAGUGCCAUAACUUCAGC	13	Positive control for GLORI (optional)
	Probe 7	UAUGGUUUAGAUUGAAUGUUGUUGUUGUGAGG(m6A)CCUUAUGUAAGUUGAAUGGUAAUAGGAAGAAGUUUG	13	Positive control for GLORI (optional)
	Probe 8	UUGUUUGAUGGAGGGGGAUAAUUAUUGGA(m6A)CAGGUAGUUAAUAUUGUAUAAUGUUGUAAGAUUAAAGAGGG	13	Positive control for GLORI (optional)
	Probe 9	GGAUUAGUUAGUAGGUGGGGUAAUGGUUUAUGA(m6A)CCUGAUGAUUUUUAGUUGGUUUGAGAGGAUGAUUAGU	13	Positive control for GLORI (optional)

## Sheet: Supplementary Table 3
	Shen W. et al.
	Supplementary Table 3 | RT primers, PCR amplification primers and sequencing primers for conversion evaluation.
	RT primers, PCR amplification primers and sequencing primers for conversion evaluation
	Primer Name	Sequence	Step	Application
	RT primer 1	GAGTCAGGTCCATTGATGCACCAAACCAACCAACCAAAAGCCGCACGCGCACAGCGGCCA	Step 37 of the main procedure and Box 2	For reverse-transcription and amplification of GLORI treated probe 5
	RT primer 2	GAGTCAGGTCCATTGATGCACCAAACCAACCAACCAAAAGCTGCACGTGCATAGCGGCTA		For reverse-transcription and amplification of untreated probe 5
	PCR primer 1	ACGGCGACCACCGAGATCTACACTCTTTCCCTGGCGCGGCGGGCGTGGCGC		For amplification of GLORI treated probe 5
	PCR primer 2	ACGGCGACCACCGAGATCTACACTCTTTCCCTAGCGCAGCGAACATGACAC		For amplification of untreated probe 5
	VchCAST_spacer2/2_fw	TAGCTGATAAC(N2-32)G
	Sequencing primer	ACGGCGACCACCGAGATCTA		For sequencing of treated or untreated probe 5
